# Supplementary material
Source: MDPI journal article supplement (https://www.mdpi.com/2073-4395/12/10/2252)
Supplement: s1 [file s1]

**Table S1.** Names and pedigree of the 20 bread wheat genotypes (6 cultivars and 14 doubled haploid lines (DHLs)) used in this study.

| Name                  | Pedigree                                                                      |
|-----------------------|-------------------------------------------------------------------------------|
| Gemmeiza-9            | Ald"s"/Huac//CMH74 .630/SxCGM 4583 -5GM- 1GM- OGM                             |
| Gemmeiza-12           | OTUS/3/SARA/THB//VEEMSS97Y00227S-5y-010M-010Y-010M-2Y-1M-0Y-OGM               |
| Sakha-93              | Sakha 92/TR810328 S8871-IS-2S-IS-0S                                           |
| Misrl                 | OASSIS / SKAUZ//4*BCN/3/2*PATOR CMSS00Y01881T-050M-030Y-030M-030WGY-33M-0Y-0S |
| Pavone-76             | Vcm//Cno/7C/3/Kal/Bb                                                          |
| KSU106                | Barouk/R1474-75-3-53-3-3                                                      |
| DHLs (23,25)          | Derived from the cross (Line-115 × Gemmeiza-7) (El-Hennawy et al. 2011)       |
| DHLs (5,7,8,11)       | Derived from the cross (Line-115 × Giza-164) (El-Hennawy et al. 2011)         |
| DHLs (12,14,15,26,29) | Derived from the cross (Gemmeiza-7× Giza-164) (El-Hennawy et al. 2011)        |
| DHLs (1,2, 6)         | Derived from the cross (Giza-164× Giza-168) (El-Hennawy et al. 2011)          |

Table S2. Details of genotype codes and names of 20 bread wheat genotypes (6 cultivars and 14 doubled haploid lines (DHLs)) used in this study

| Genotypes   | Genotype code | Genotypes | Genotype code |
|-------------|---------------|-----------|---------------|
| DHL12       | G1            | DHL14     | G11           |
| DHL02       | G2            | DHL29     | G12           |
| DHL25       | G3            | DHL15     | G13           |
| DHL07       | G4            | DHL06     | G14           |
| DHL26       | G5            | Misr1     | G15           |
| Gemmeiza-9  | G6            | DHL05     | G16           |
| DHL11       | G7            | DHL23     | G17           |
| KSU106      | G8            | Sakha-93  | G18           |
| Gemmeiza-12 | G9            | Pavone-76 | G19           |
| DHL01       | G10           | DHL08     | G20           |
